# Supplementary material for: Characterization and phylogenetic analysis of the complete mitochondrial genome sequence of Diospyros oleifera, the first representative from the family Ebenaceae
Source: PubMed Central journal article supplement (PMC9283892; doi:10.1016/j.heliyon.2022.e09870), 2022-07-06

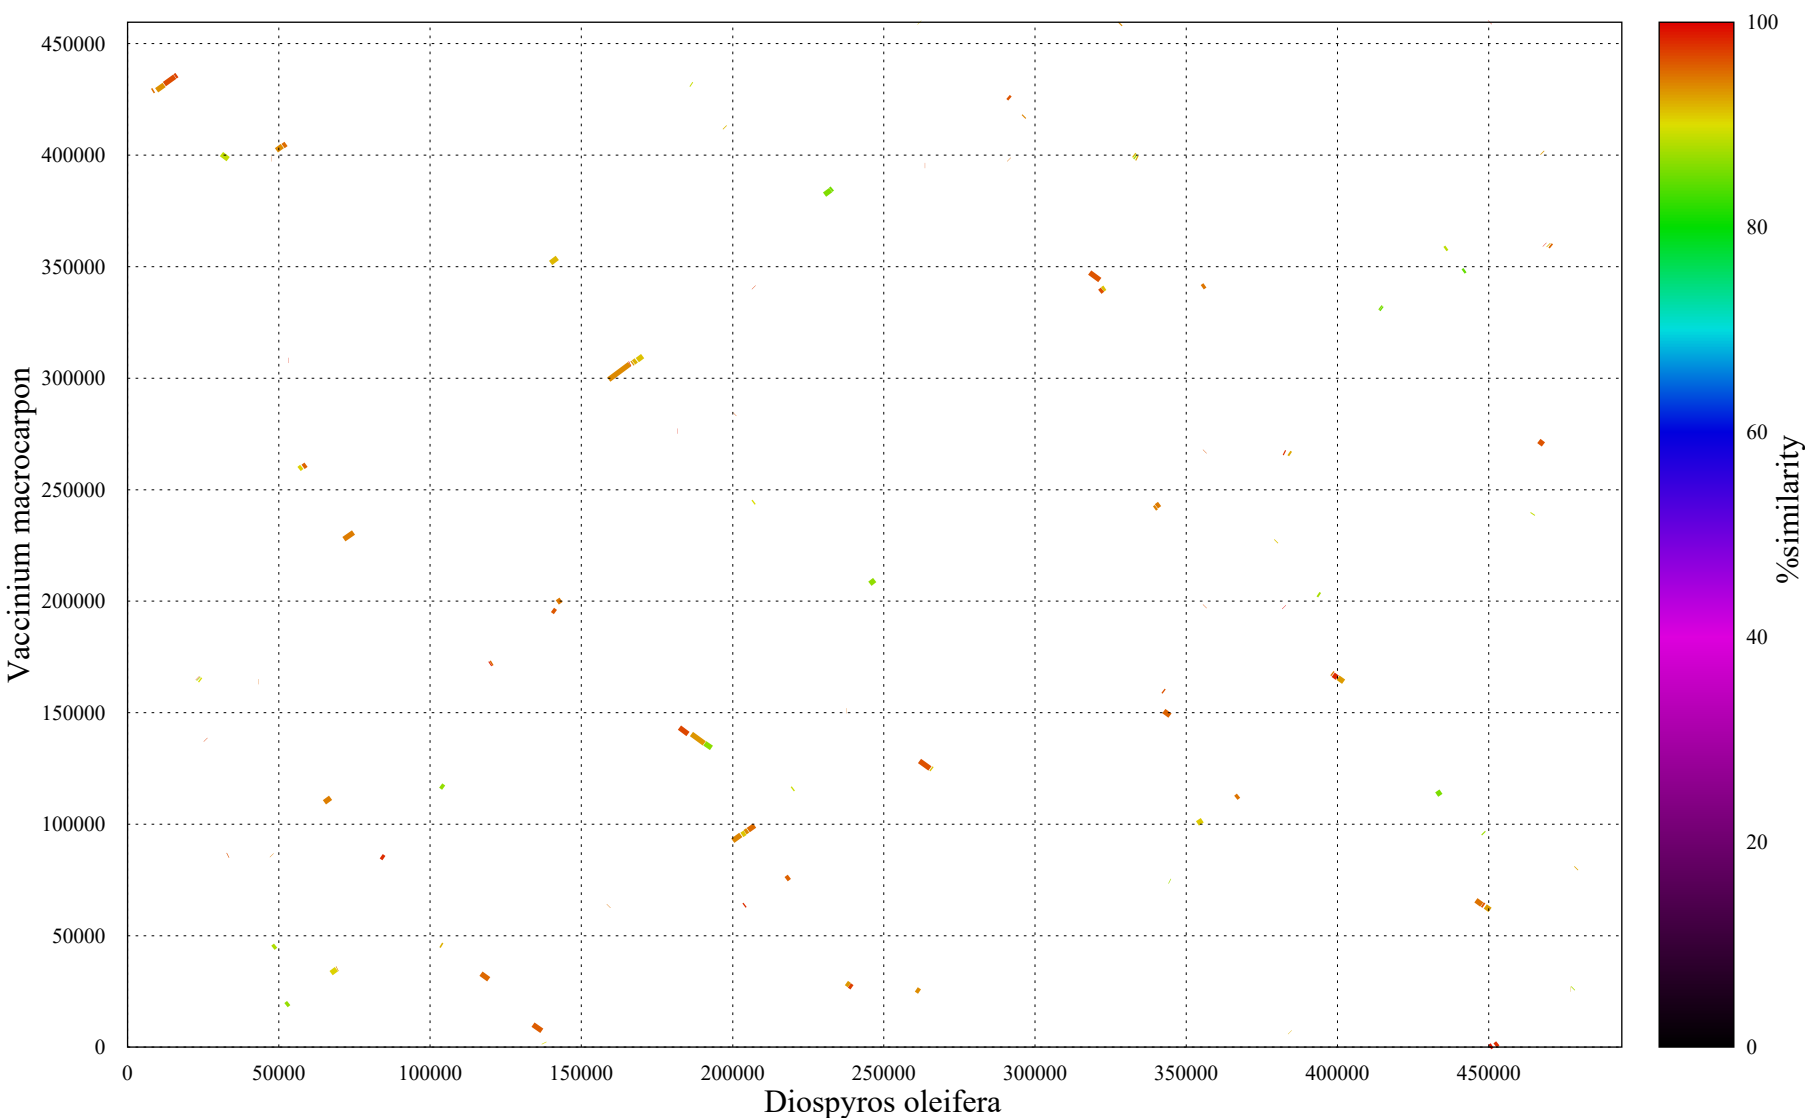

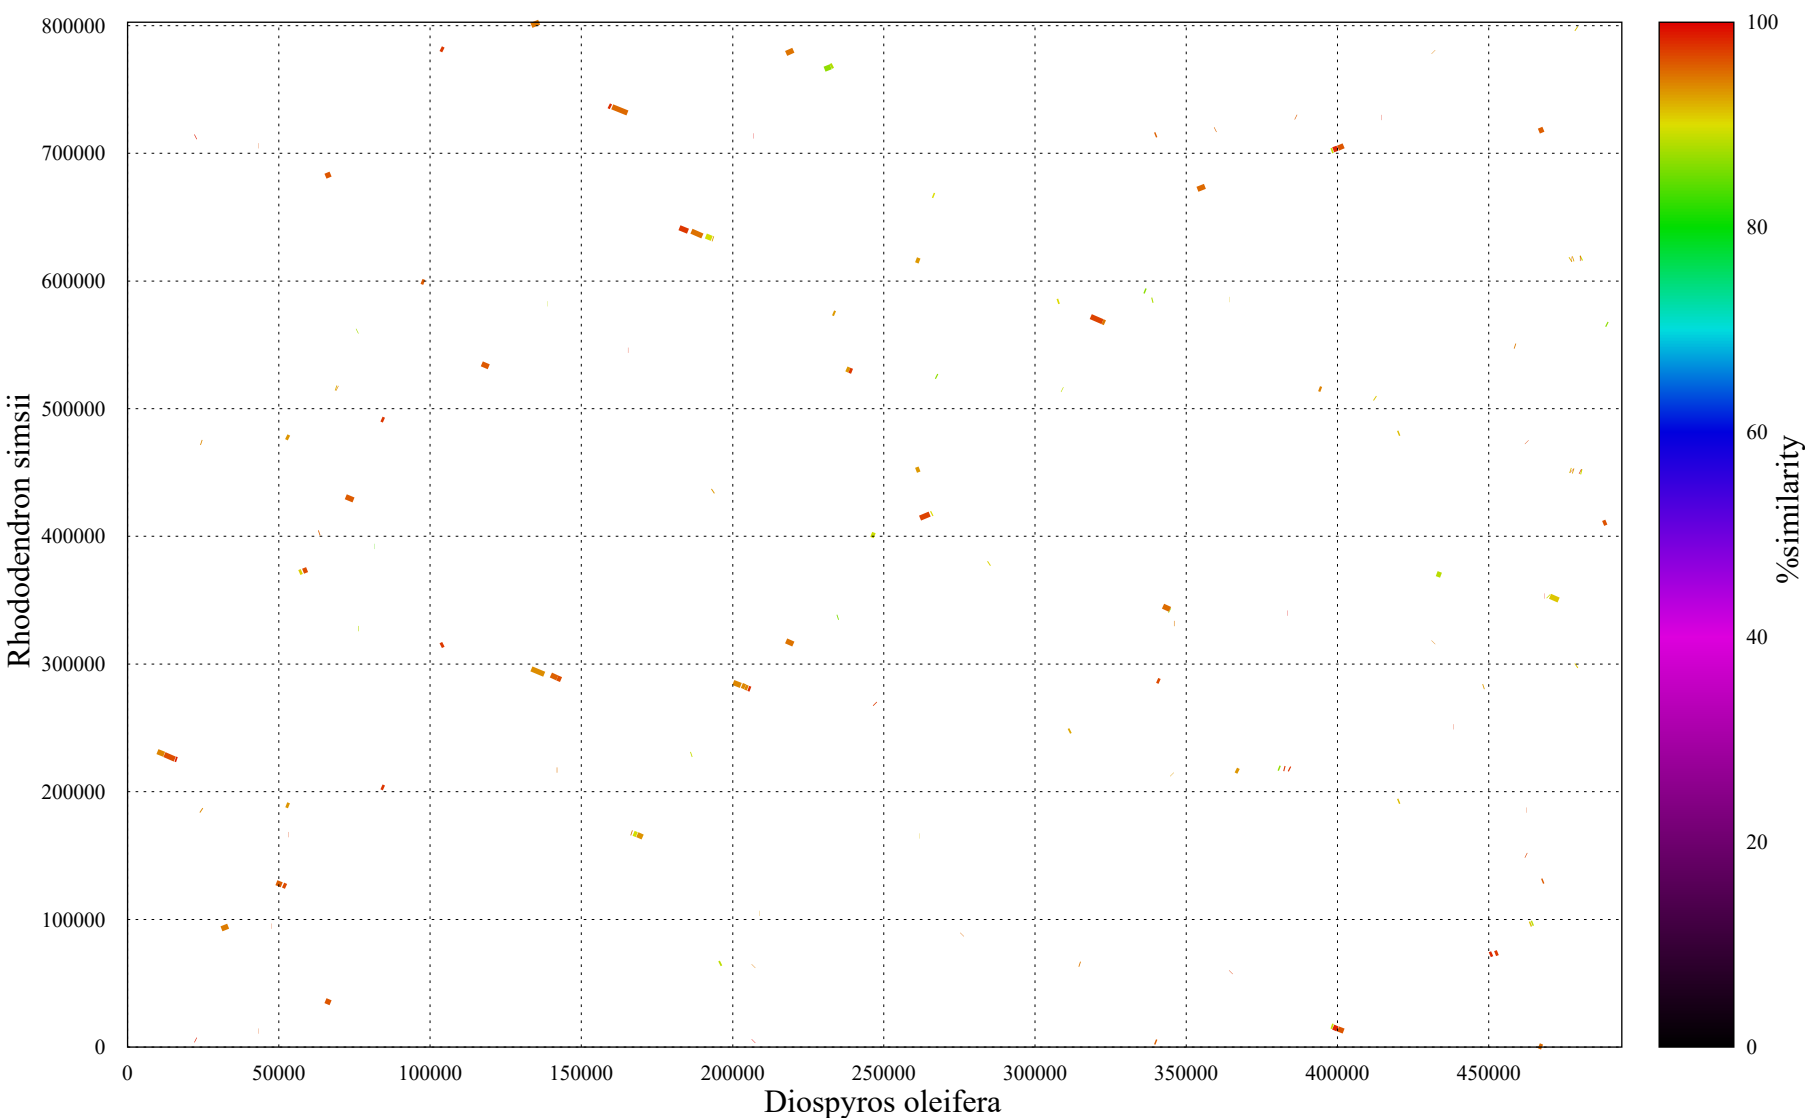

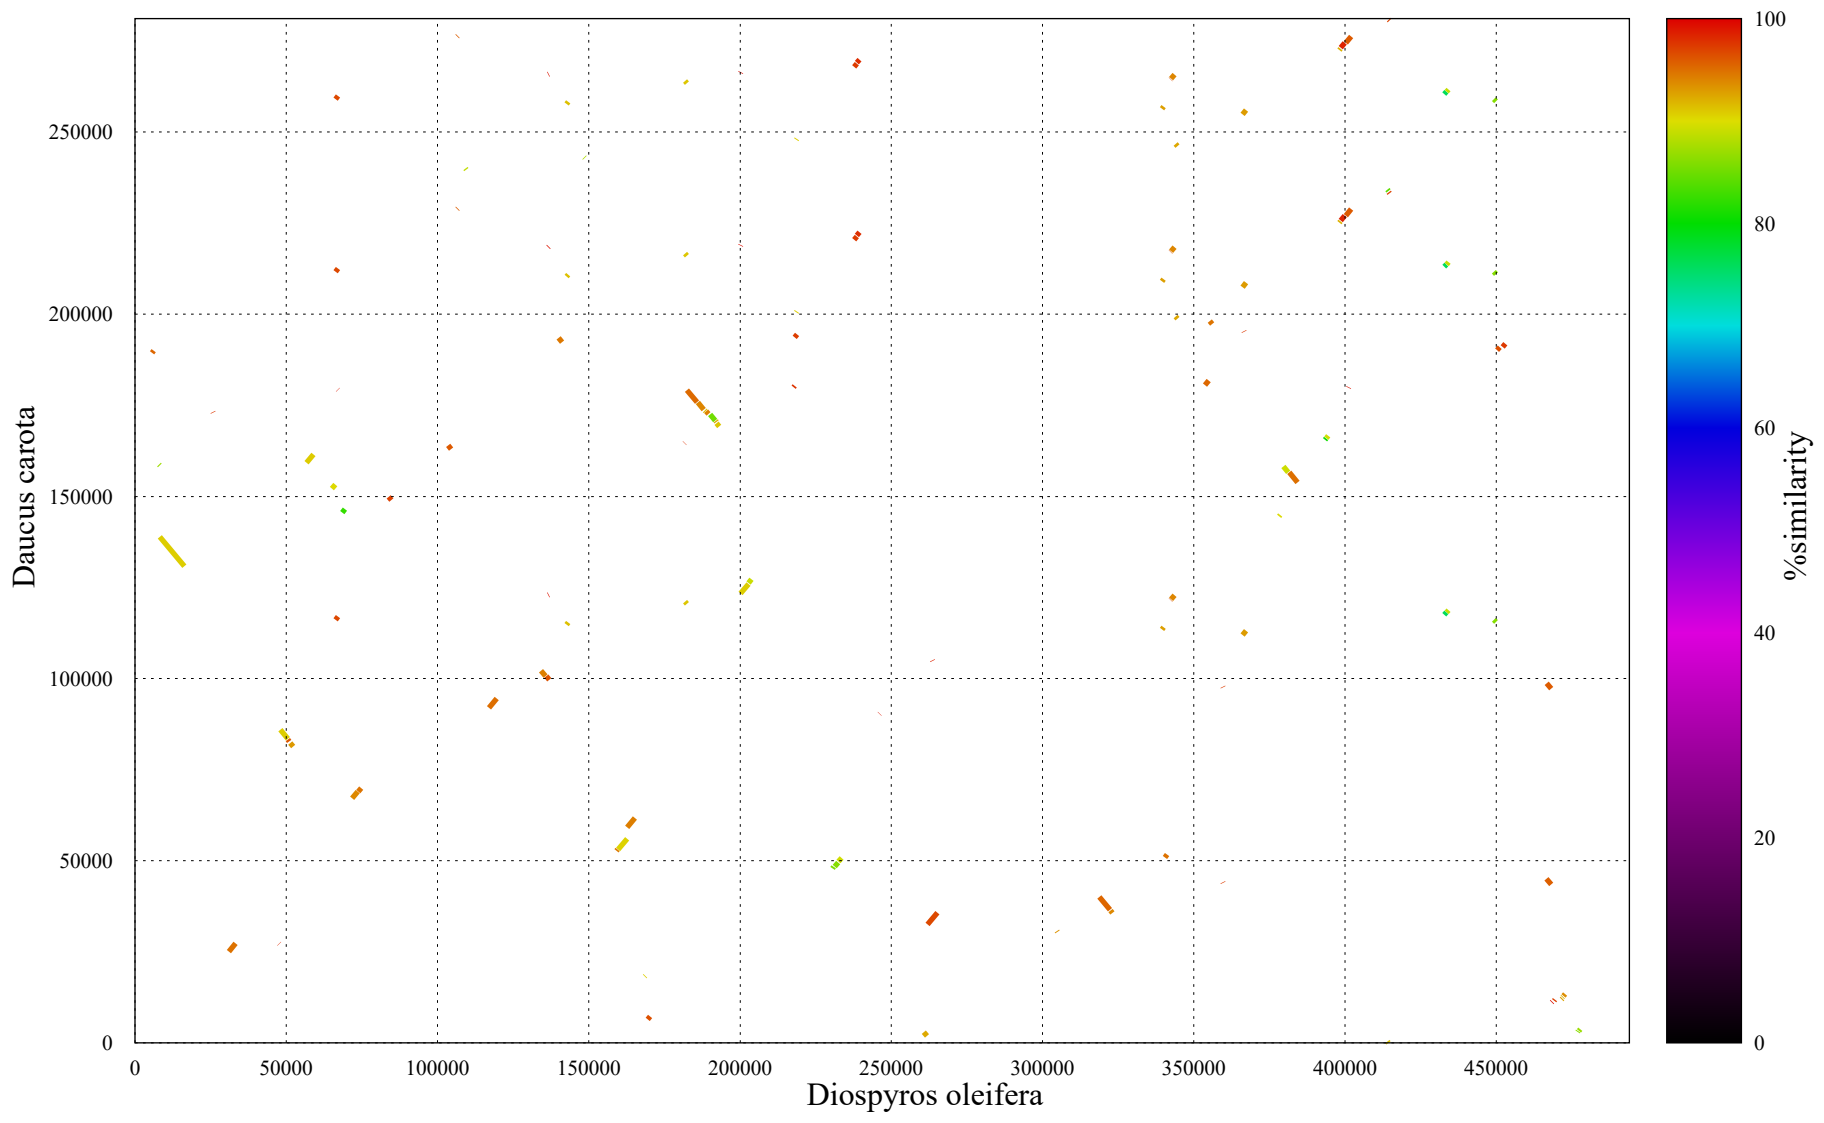

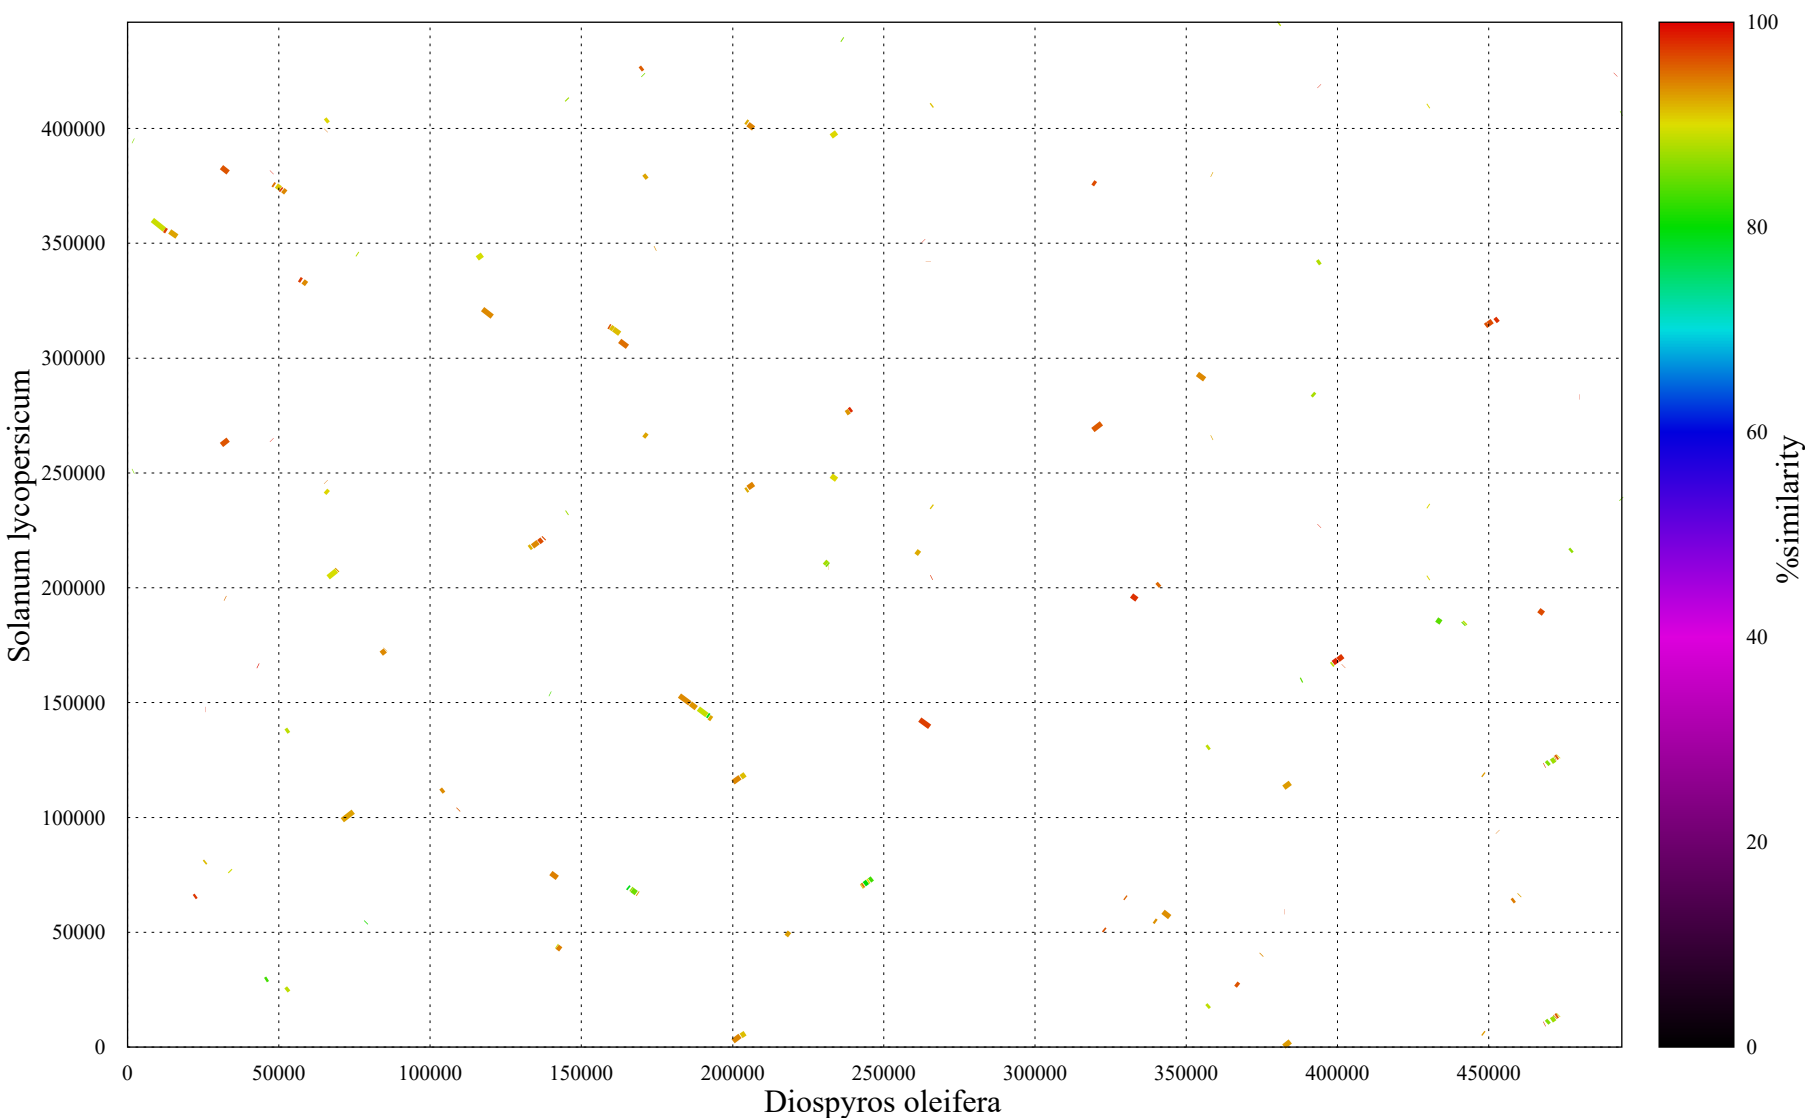

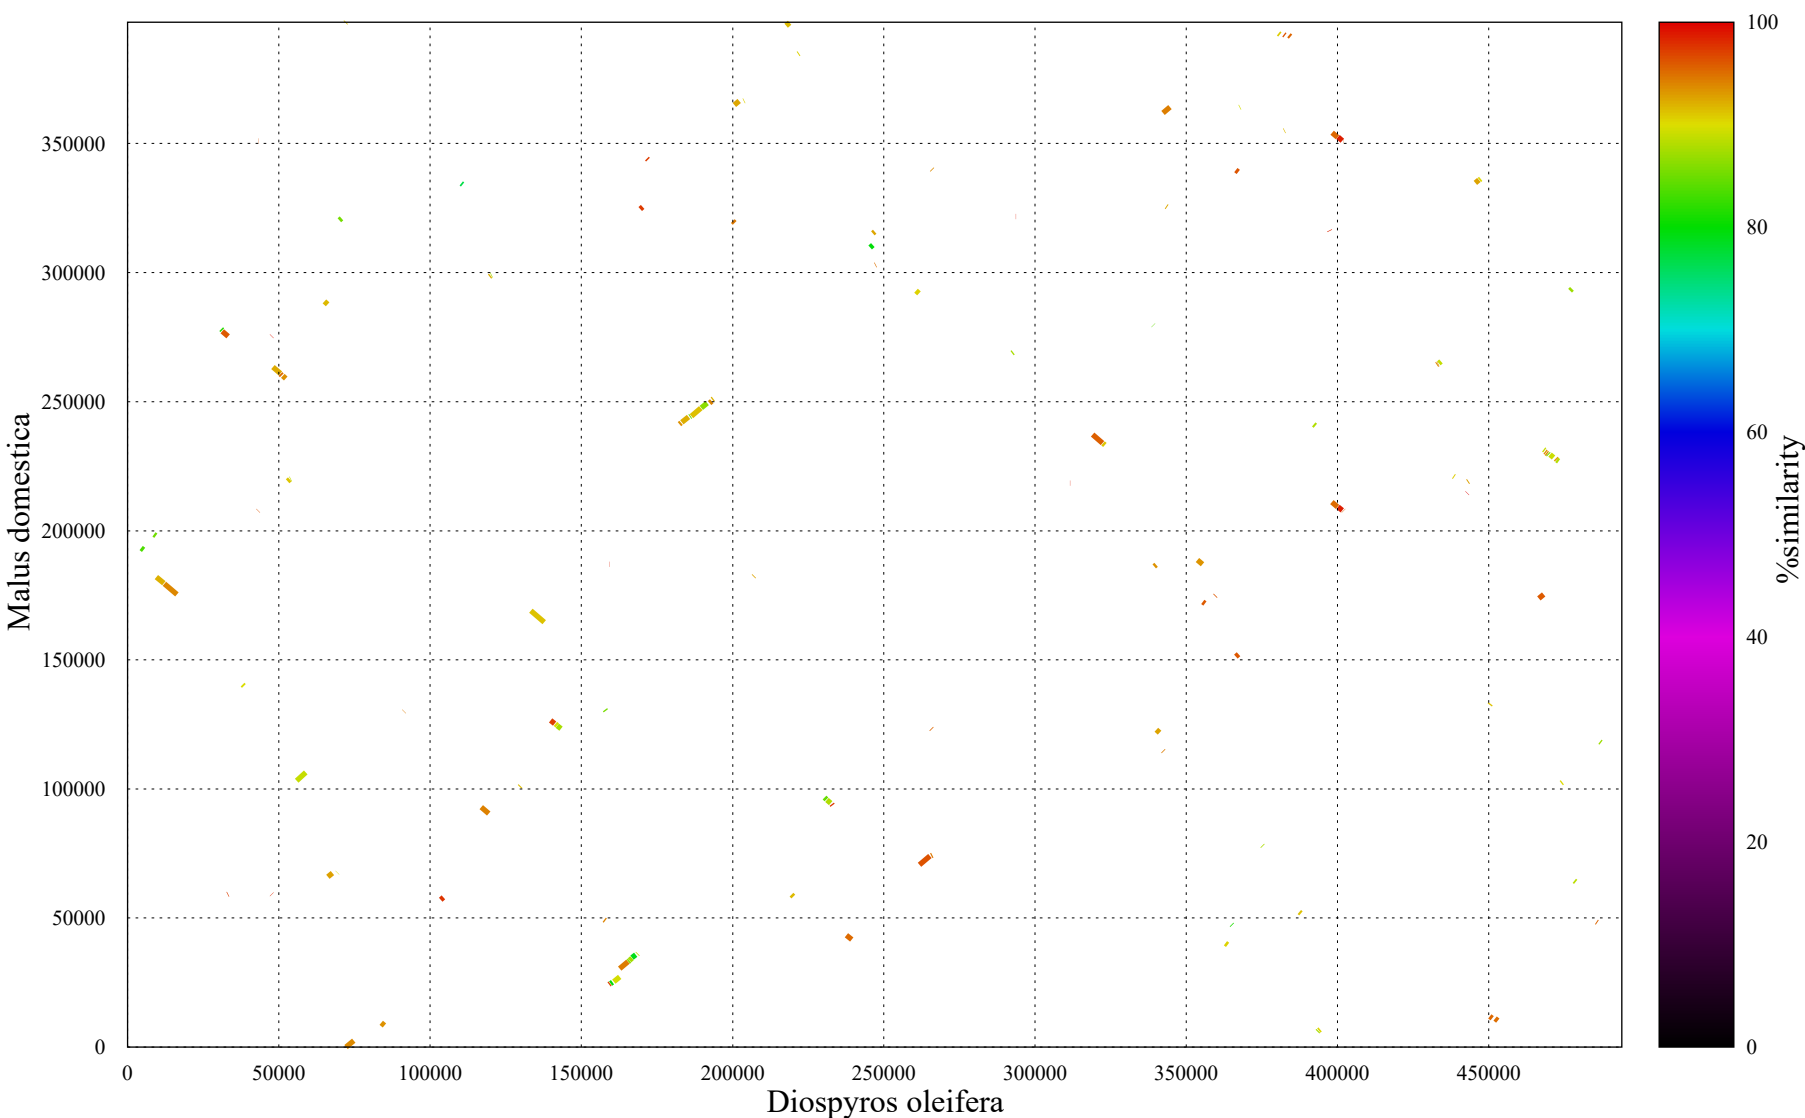

Supplement: mmc1.pdf [file mmc1.pdf]
