# Supplementary material for: Characterization and phylogenetic analysis of the complete mitochondrial genome sequence of Diospyros oleifera, the first representative from the family Ebenaceae
Source: PubMed Central journal article supplement (PMC9283892; doi:10.1016/j.heliyon.2022.e09870), 2022-07-06
Supplement: mmc2.pdf [file mmc2.pdf]

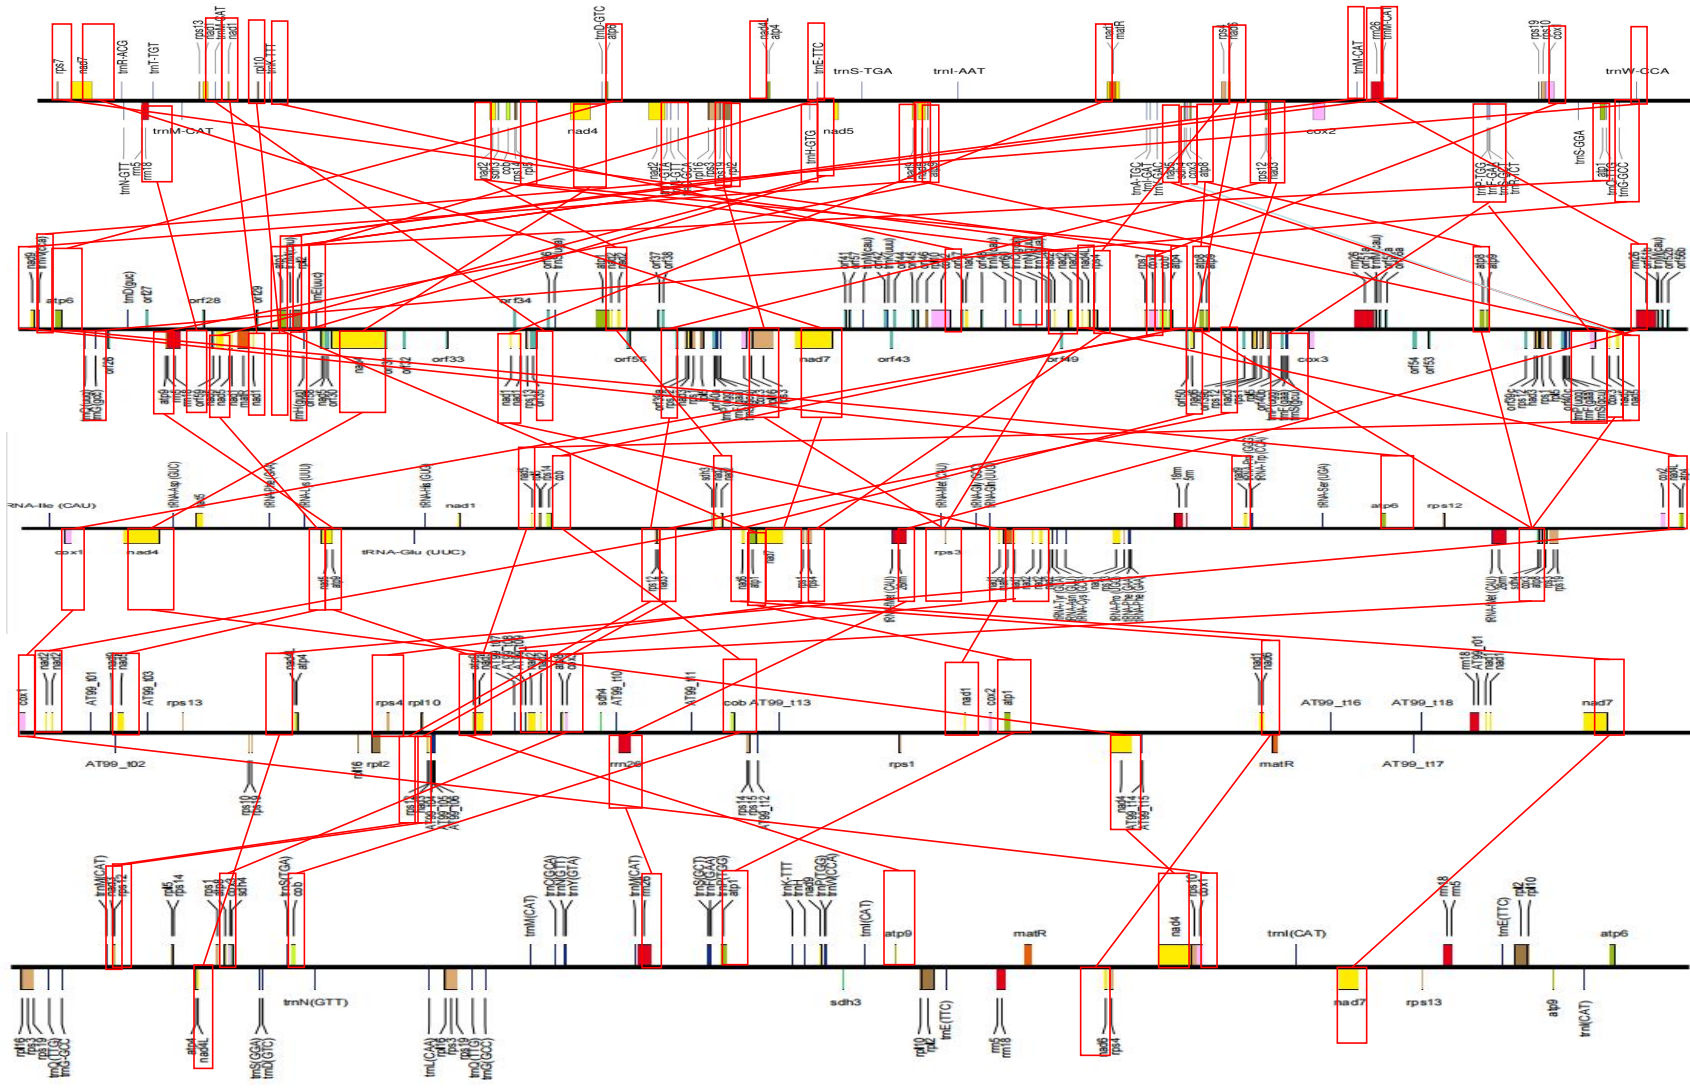

*Diospyros oleifera*  
mitochondrial genome  
(493,958)

*Daucus carota subsp sativus*  
mitochondrial genome  
(281,132)

*Malus domestica*  
mitochondrial genome  
(396,947)

*Vaccinium macrocarpon*  
mitochondrial genome  
(459,678)

*Solanum lycopersicum*  
mitochondrial genome  
(446,257)
